# Supplementary material for: Dendritic cell vaccination with a toll-like receptor agonist derived from mycobacteria enhances anti-tumor immunity
Source: PubMed Central journal article supplement (PMC4741802; doi:10.18632/oncotarget.5281), 2015-09-16
Supplement: oncotarget-06-33781-s001.pdf [file oncotarget-06-33781-s001.pdf]

SUPPLEMENTARY FIGURES

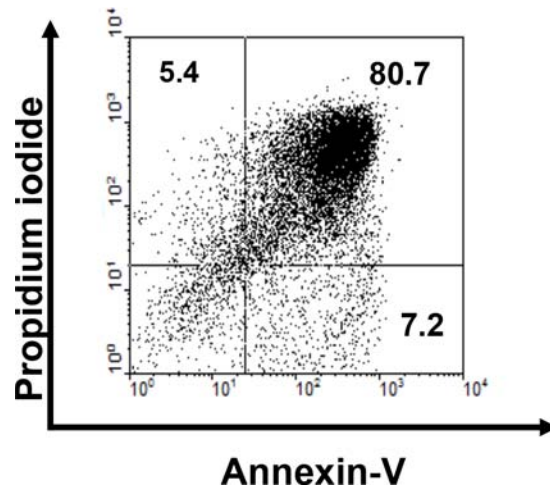

Supplementary Figure S1: Apoptosis in the  $\gamma$ -irradiated MC-38 cells was confirmed by staining with annexin-V and propidium iodide, ~96% of cells underwent apoptosis.

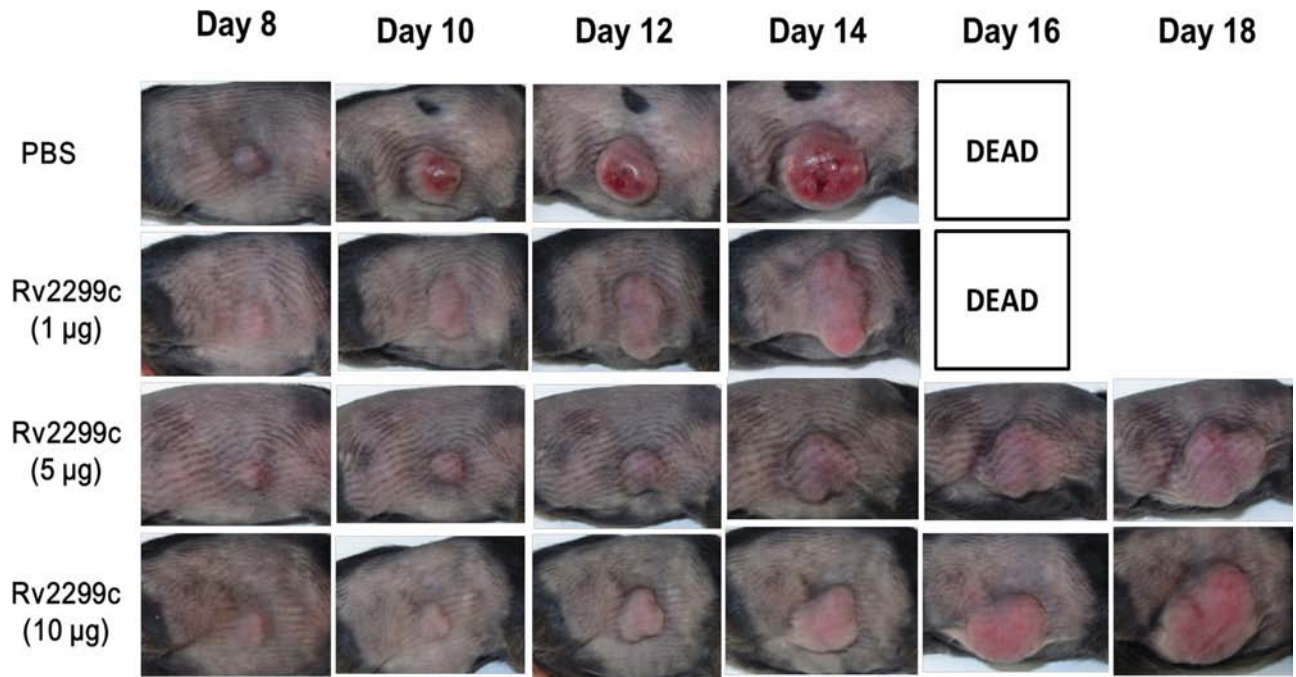

Supplementary Figure S2: Representative pictures of mice treated with 5- and 10-µg Rv2299c showed significantly greater inhibition of tumor growth compared to those receiving 1-µg Rv2299c or the PBS control ( $P < 0.05$ ).

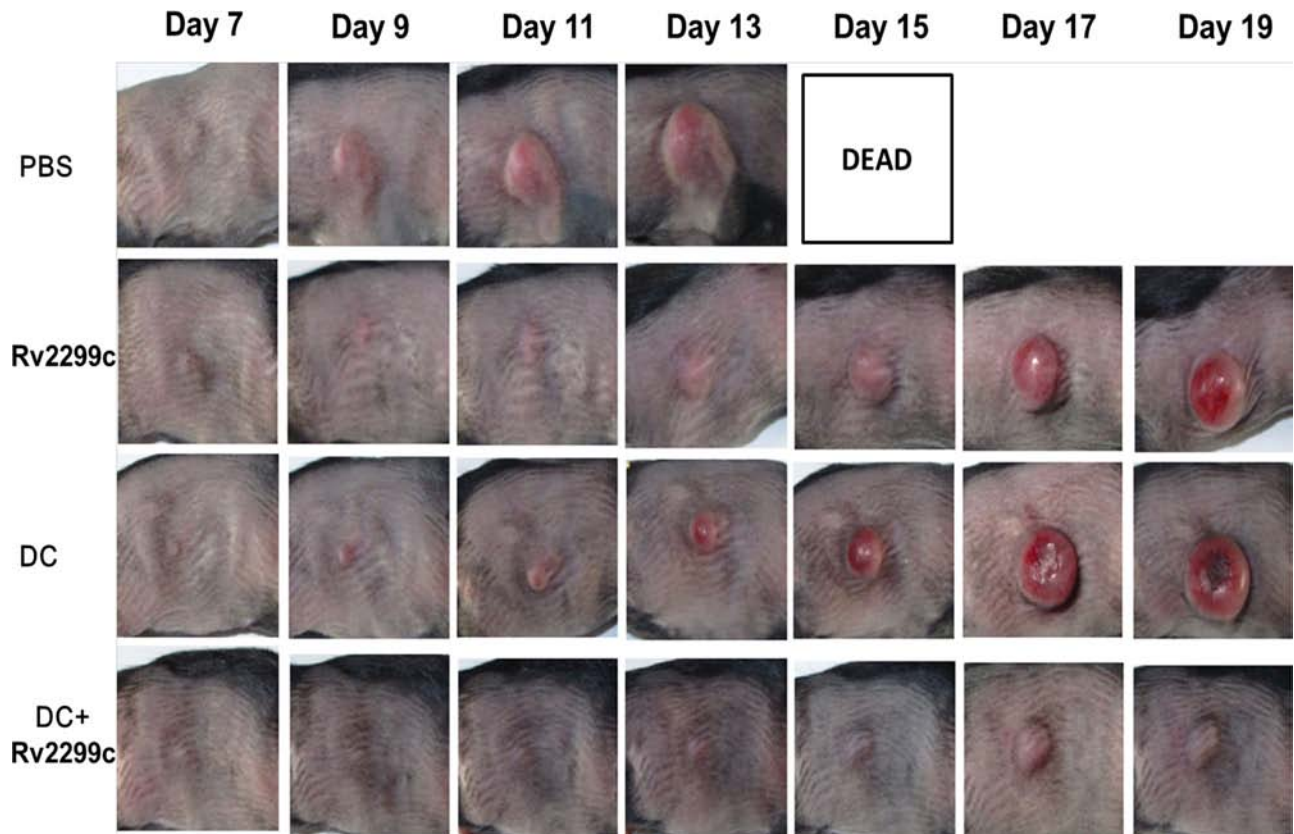

**Supplementary Figure S3: Representative pictures of mice vaccinated with TA-loaded DC plus Rv2299c showed significant inhibition of tumor growth compared to the PBS control or TA-loaded DC or Rv2299c injection ( $P < 0.05$  on day 19). Experiments consisted of eight mice per group.**

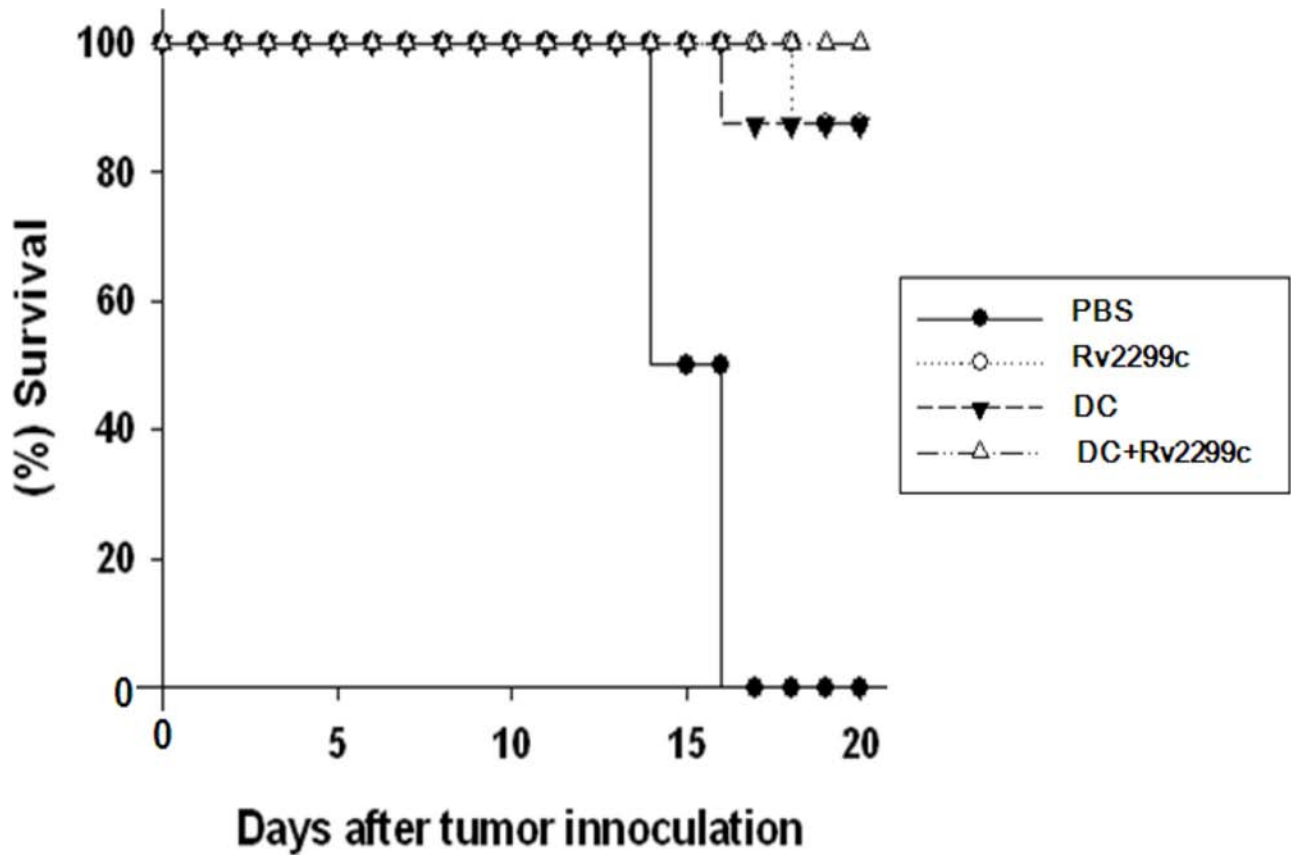

**Supplementary Figure S4: The combination of TA-loaded DC vaccination plus Rv2299c injection prolonged survival of vaccinated mice.** The survival rate of the vaccination groups was evaluated every 2 days. Experiments consisted of eight mice per group.
